# Supplementary material
Source: publisher figshare collection journal article supplement (https://acs.figshare.com/ndownloader/files/11226227)
Supplement: Supplementary file 1 [file 11226227]

## **SUPPORTING INFORMATION**

### **Rational Design and Development of Lanthanide-doped NaYF<sub>4</sub>@CdS-Au-RGO as Quaternary Plasmonic Photocatalysts for Harnessing Visible-NIR Broadband Spectrum**

Ajay Kumar, Kumbam Lingeshwar Reddy, Suneel Kumar,

Ashish Kumar, Vipul Sharma and Venkata Krishnan\*

School of Basic Sciences and Advanced Materials Research Center, Indian Institute of Technology Mandi, Kamand, Mandi 175005, Himachal Pradesh, India.

Email: vkn@iitmandi.ac.in

| Sl. No. | Content                                                                                                                                                                                   | Page No. |
|---------|-------------------------------------------------------------------------------------------------------------------------------------------------------------------------------------------|----------|
| 1       | TEM image and EDAX spectrum of Au NP (Figure S1)                                                                                                                                          | S-4      |
| 2       | XRD pattern of GO and RGO (Figure S2)                                                                                                                                                     | S-5      |
| 3       | N <sub>2</sub> adsorption-desorption isotherms, pore size distribution curves and BET surface area plots for UCNP, UC, UCA and UCAG4 nanocomposite (Figure S3)                            | S-6      |
| 4       | Summary of specific surface area and pore volume distribution of UCNP, UC, UCA and UCAG4 nanocomposites (Table S1)                                                                        | S-7      |
| 5       | Elemental mapping and EDAX spectrum of UCAG4 (Figure S4)                                                                                                                                  | S-8      |
| 6       | XPS spectra of NaYF <sub>4</sub> :Yb/Er@CdS-Au-RGO (a) survey spectrum (b) Position of the valance band edge (EVBM) and the intrinsic Fermi level (EF) of UCAG4 nanocomposite (Figure S5) | S-9      |
| 7       | UV-vis spectra of (a) bare CdS, GO and Au NP, and (b) UCAG1, UCAG2, UCAG3, UCAG4 and UCAG5 nanocomposites (Figure S6)                                                                     | S-10     |
| 8       | PL spectra of CdS, UC, UCA, UCAG3 and UCAG4 (Figure S7)                                                                                                                                   | S-11     |
| 9       | DRS and plot of the transformed Kubelka–Munk function vs. the energy of light for CdS, UC, UCA, UCAG1, UCAG2, UCAG3, UCAG4 and UCAG5, respectively (Figure S8)                            | S-12     |
| 10      | Structure of CFX molecule (Figure S9)                                                                                                                                                     | S-13     |
| 11      | Photographs of pure CFX solution and UCAG4 in CFX solution (Figure S10)                                                                                                                   | S-14     |
| 12      | Adsorption/degradation of CFX on UCAG4 nanocomposite under visible light irradiation (Figure S11)                                                                                         | S-15     |
| 13      | Adsorption isotherm of CFX on UCAG4 nanocomposite (Figure S12)                                                                                                                            | S-16     |

|    |                                                                                                                                                               |      |
|----|---------------------------------------------------------------------------------------------------------------------------------------------------------------|------|
| 14 | Time dependent absorption spectra of CFX under visible irradiation (Figure S13)                                                                               | S-17 |
| 15 | Time dependent absorption spectra of CFX under NIR irradiation (Figure S14)                                                                                   | S-18 |
| 16 | Summary of kinetic data of photocatalytic degradation of CFX under visible irradiation (Table S2)                                                             | S-19 |
| 17 | Summary of kinetic data of photocatalytic degradation of CFX under NIR irradiation (Table S3)                                                                 | S-20 |
| 18 | Fitting of different models for kinetics of photocatalytic degradation of CFX using different catalysts under visible and NIR light irradiations (Figure S15) | S-21 |
| 19 | Mass spectra of (a) CFX before degradation, and (b, c, d) degradation products of CFX after visible light irradiation for 180 min (Figure S16)                | S-22 |
| 20 | Summary of observed and calculated molecular ion masses of different fragments obtained by mass analysis and their proposed molecular structures (Table S4)   | S-23 |

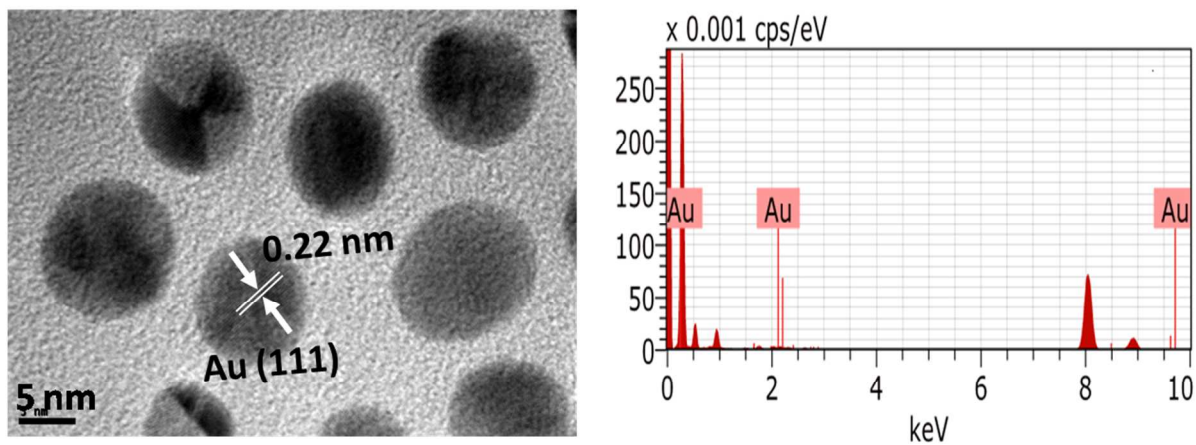

**Figure S1.** TEM image of Au NP (left). The interplanar distance of 0.22 nm can be indexed to the lattice spacing of the (111) plane of the face-centered cubic Au NP. EDAX spectrum of Au NP (right) is also given.

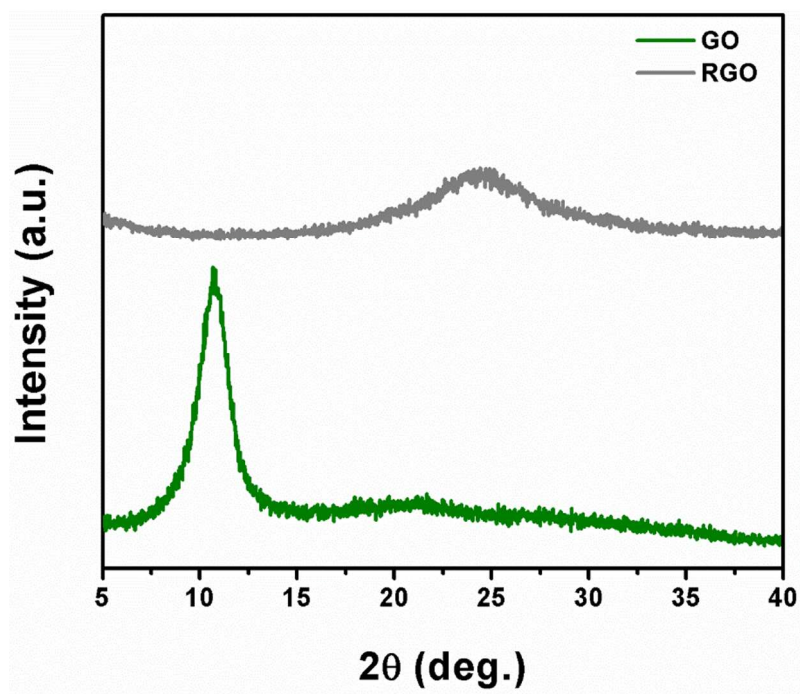

**Figure S2.** XRD pattern of GO and RGO.

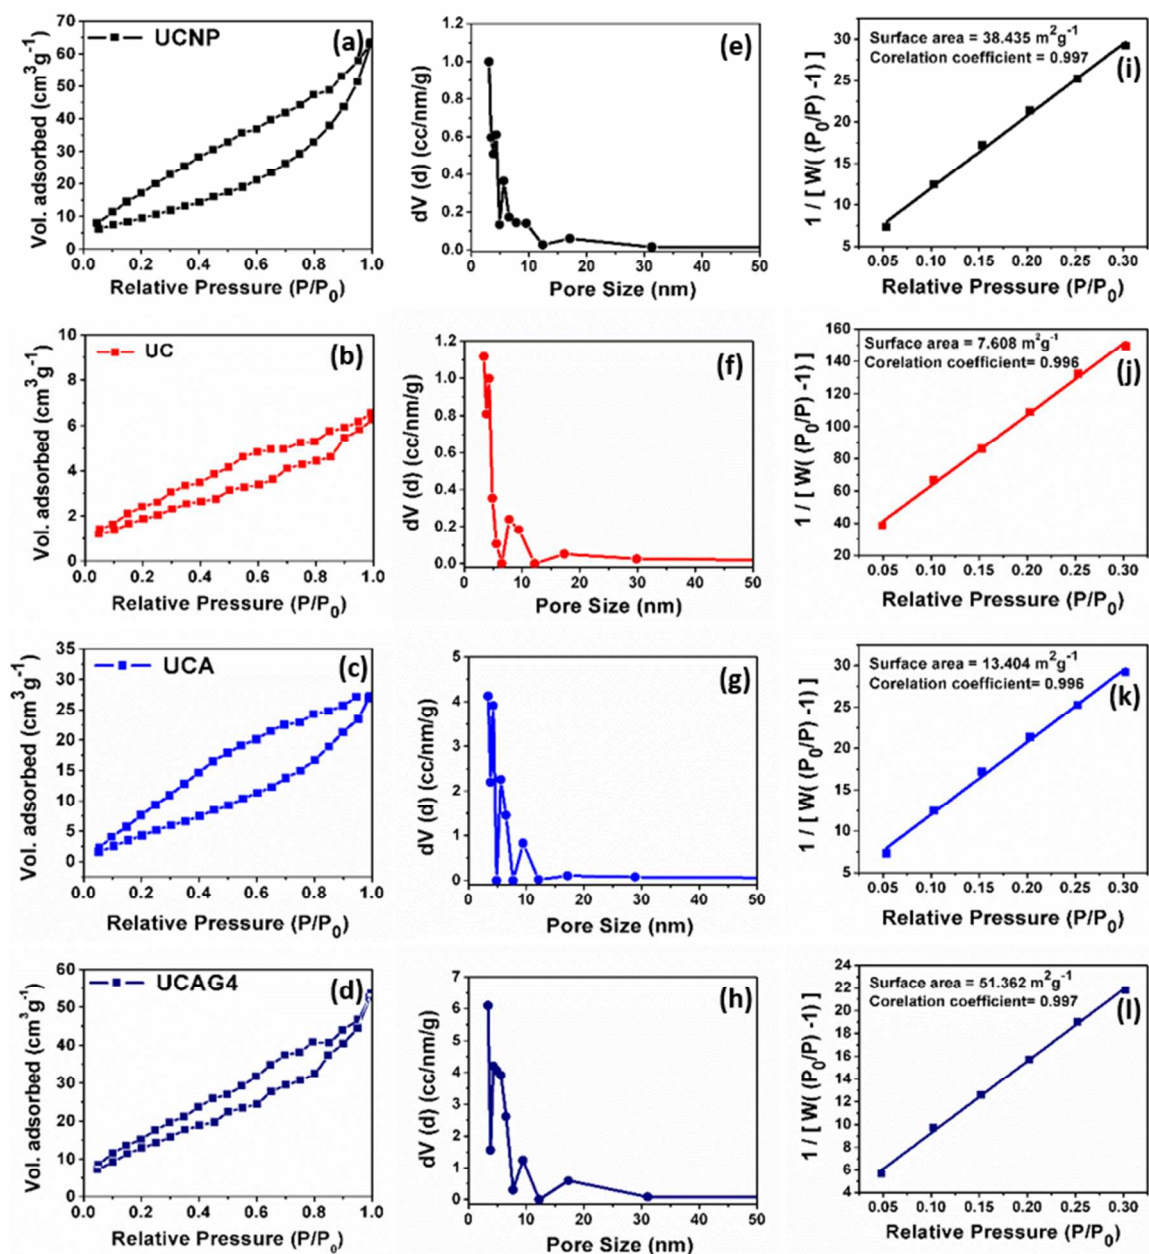

**Figure S3.** (a-d) N<sub>2</sub> adsorption-desorption isotherms, (e-h) pore size distribution curves and (i-l) BET surface area plots for UCNP, UC, UCA and UCAG4 nanocomposite, respectively.

**Table S1.** Summary of specific surface area and pore volume distribution of UCNP, UC, UCA and UCAG4 nanocomposites.

| <b>Sample</b> | <b><math>S_{\text{BET}}</math> (<math>\text{m}^2 \text{g}^{-1}</math>)</b> | <b>Pore volume (<math>\text{cc g}^{-1}</math>)</b> |
|---------------|----------------------------------------------------------------------------|----------------------------------------------------|
| UCNP          | 38.435                                                                     | 0.083                                              |
| UC            | 7.608                                                                      | 0.008                                              |
| UCA           | 13.404                                                                     | 0.029                                              |
| UCAG4         | 51.362                                                                     | 0.067                                              |

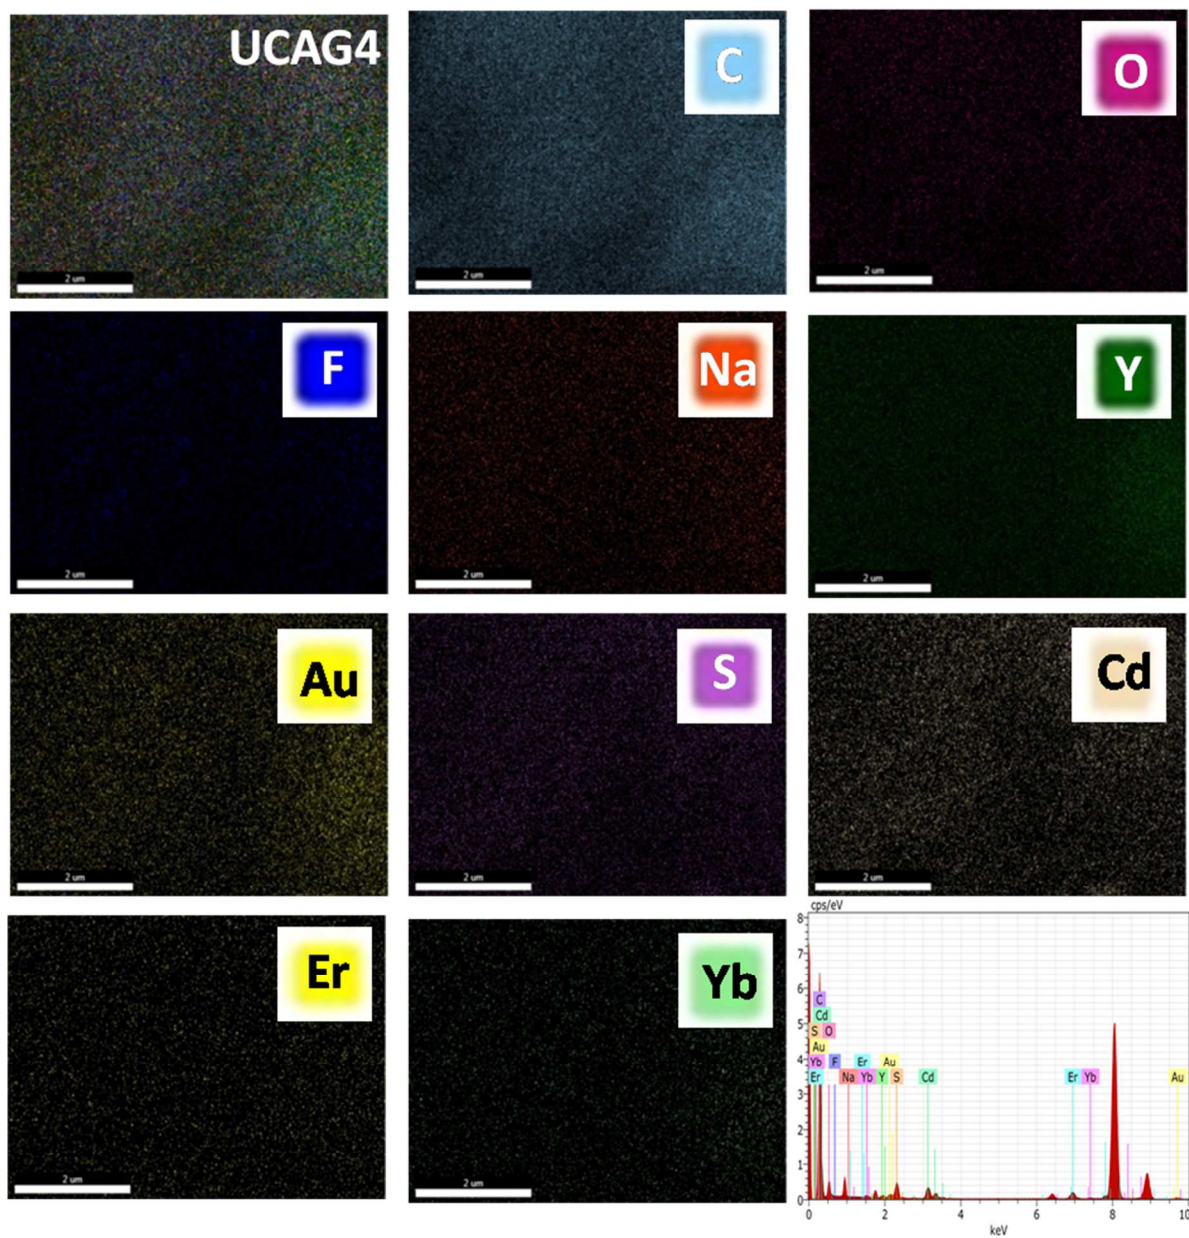

**Figure S4.** SEM elemental mapping and EDAX spectrum of UCAG4.



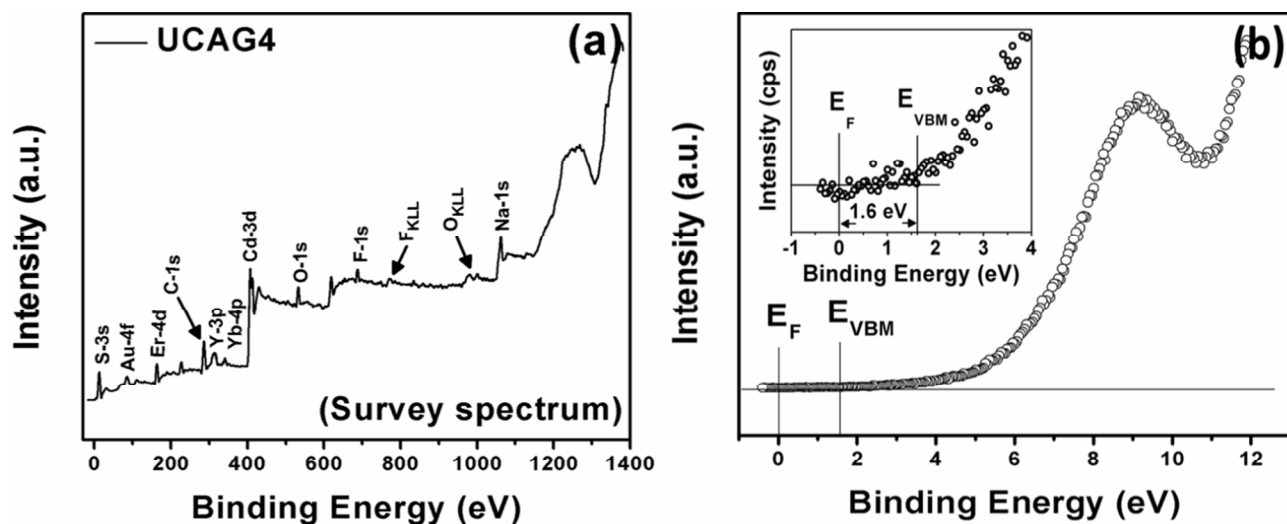

**Figure S5.** XPS for UCAG4 nanocomposite (a) survey spectrum, (b) position of the valance band edge ( $E_{VBM}$ ) and the intrinsic Fermi level ( $E_F$ ) of UCAG4 nanocomposite, wherein the magnified region of interest is shown in the inset.

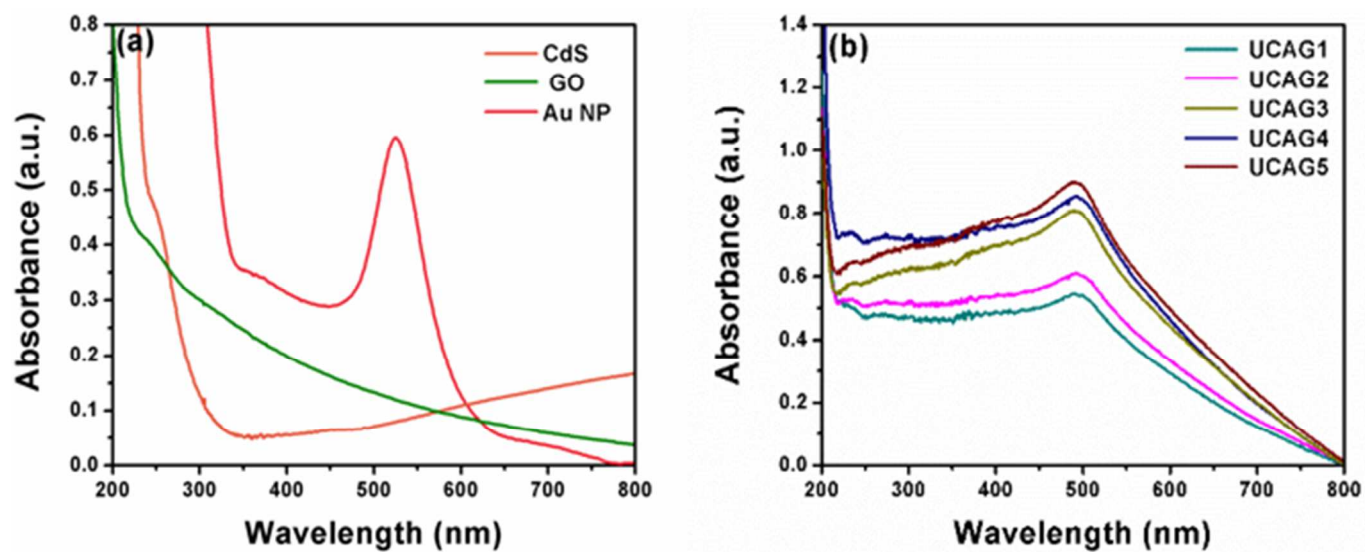

**Figure S6.** UV-vis spectra of (a) bare CdS, GO and Au NP, and (b) UCAG1, UCAG2, UCAG3, UCAG4 and UCAG5 nanocomposites.

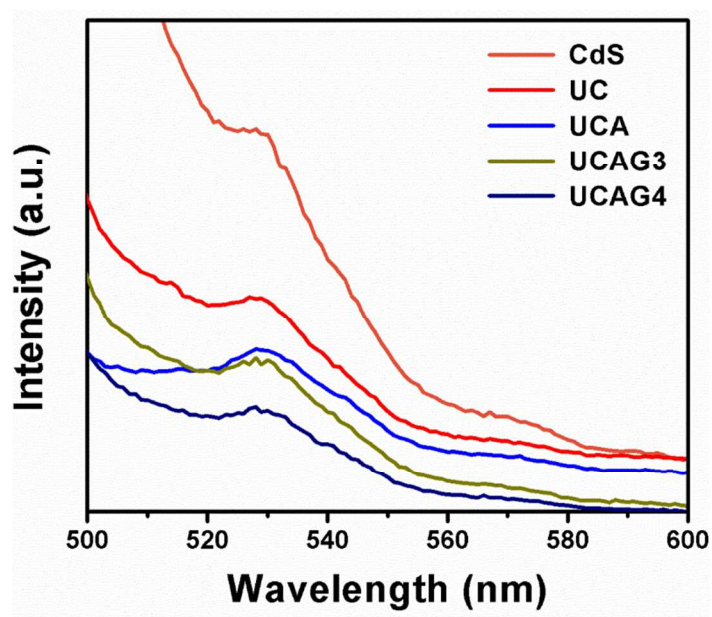

**Figure S7.** PL spectra of CdS, UC, UCA, UCAG3 and UCAG4.

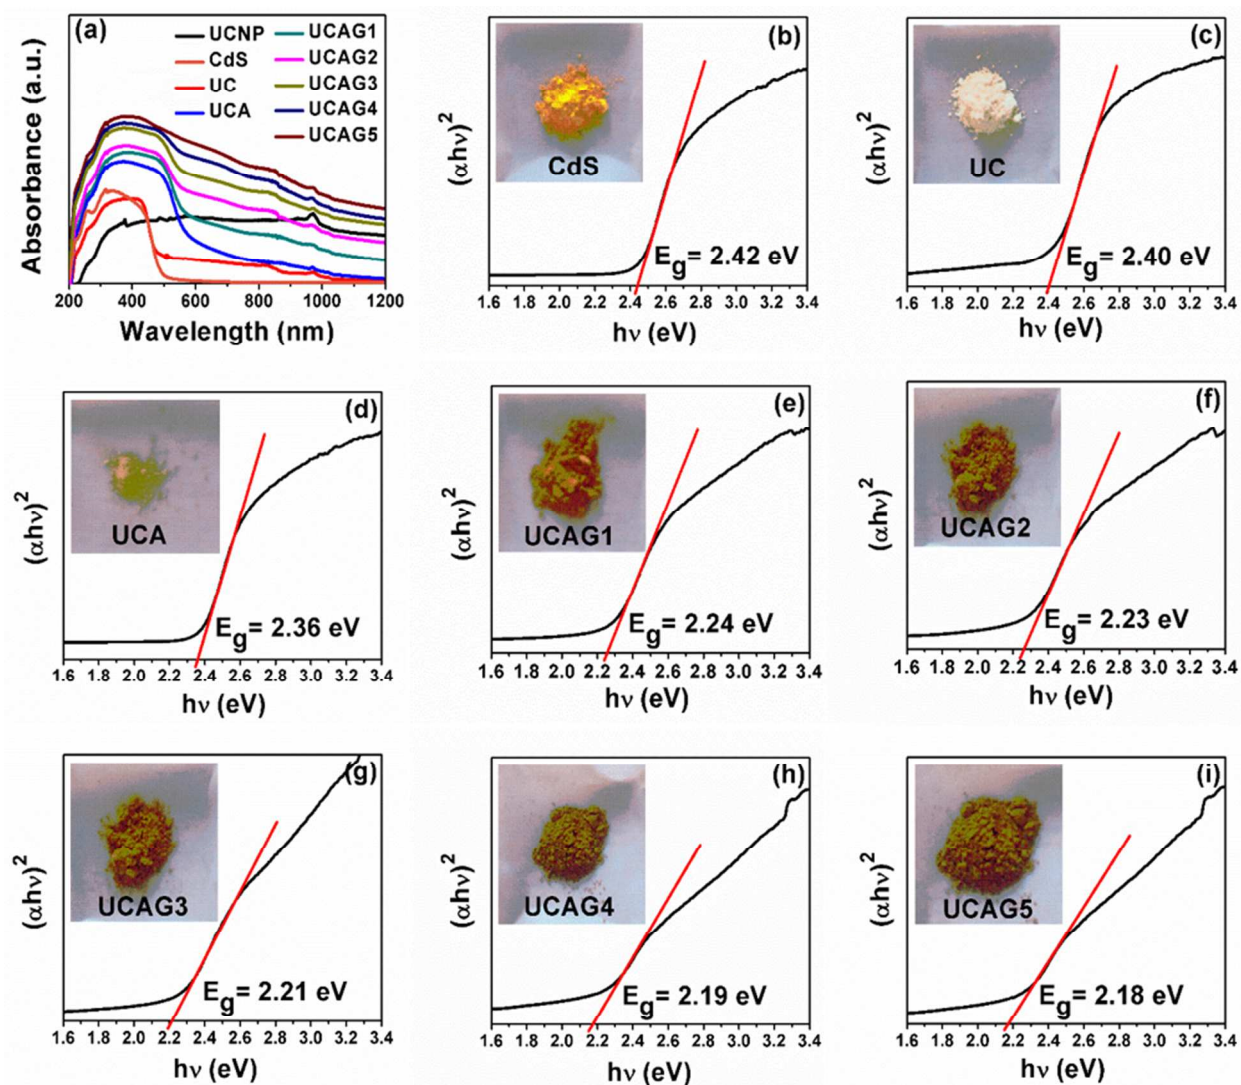

**Figure S8.** (a) DRS plot of CdS, UC, UCA, UCAG1, UCAG2, UCAG3, UCAG4 and UCAG5; (b-i) Plot of the transformed Kubelka–Munk function vs. the energy of light for CdS, UC, UCA, UCAG1, UCAG2, UCAG3, UCAG4 and UCAG5, respectively.

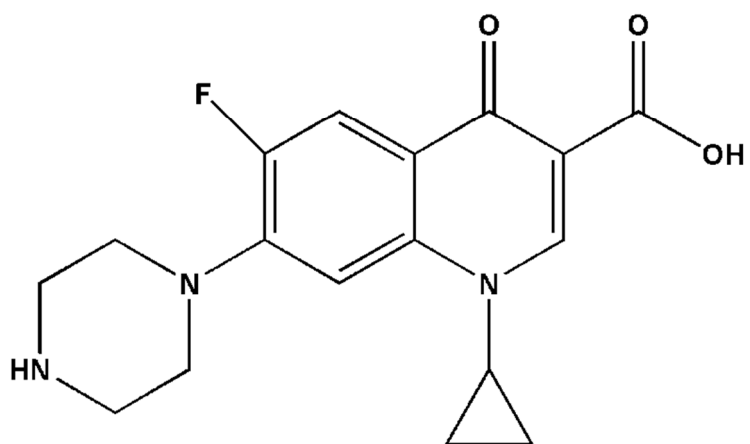

**Figure S9.** Structure of CFX molecule.

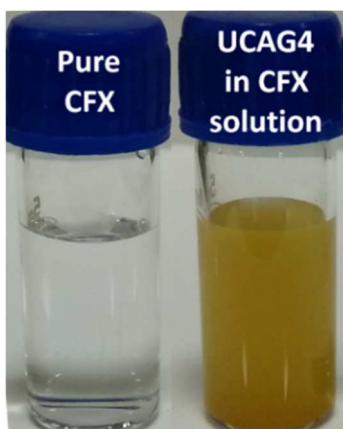

**Figure S10.** Photographs of pure CFX solution and UCAG4 in CFX solution clearly showing good dispersion of drug and UCAG4 nanocomposite.

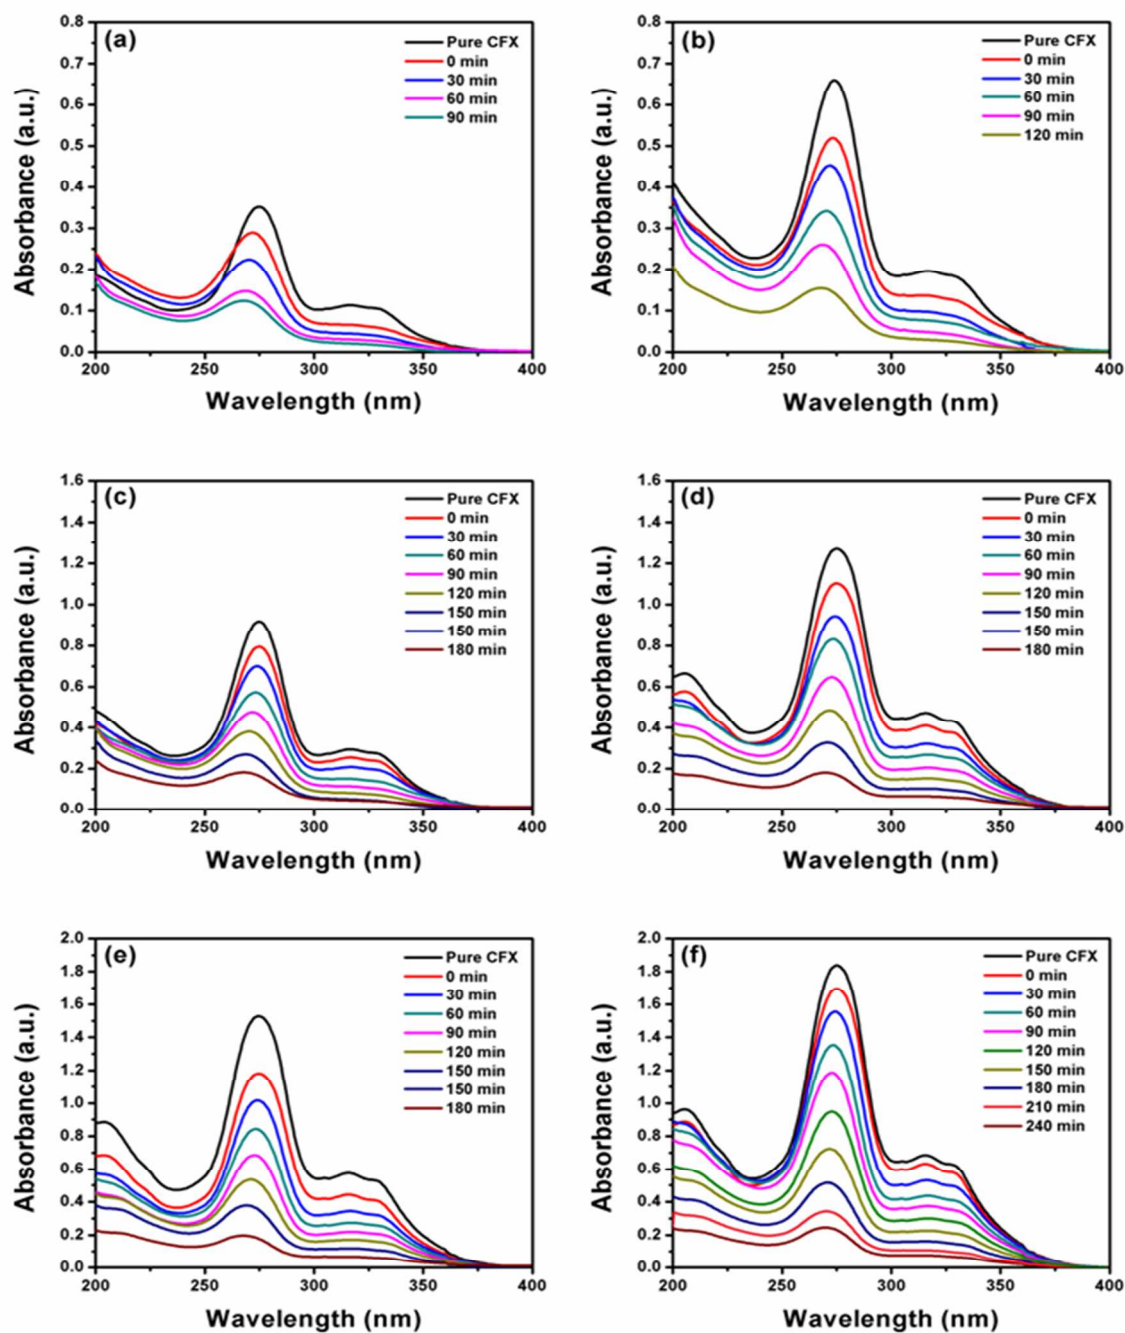

**Figure S11.** Adsorption/degradation of CFX on UCAG4 nanocomposite under visible light irradiation: (a) 10  $\mu$ M CFX (b) 20  $\mu$ M CFX (c) 30  $\mu$ M CFX (d) 40  $\mu$ M CFX (e) 50  $\mu$ M CFX and (f) 60  $\mu$ M CFX.

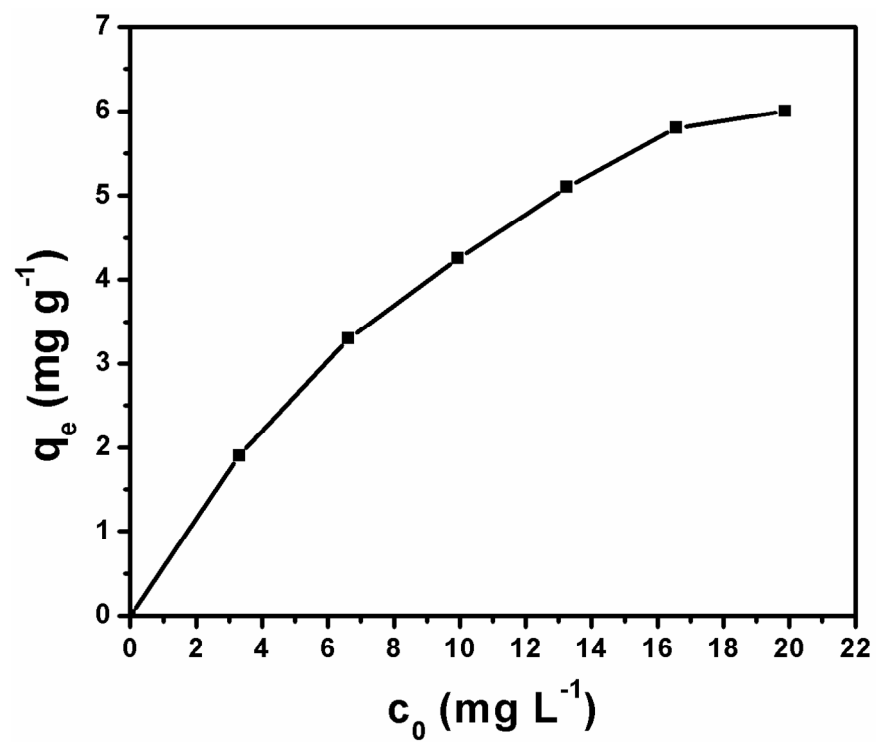

**Figure S12.** Adsorption isotherm of CFX on UCAG4 nanocomposite.



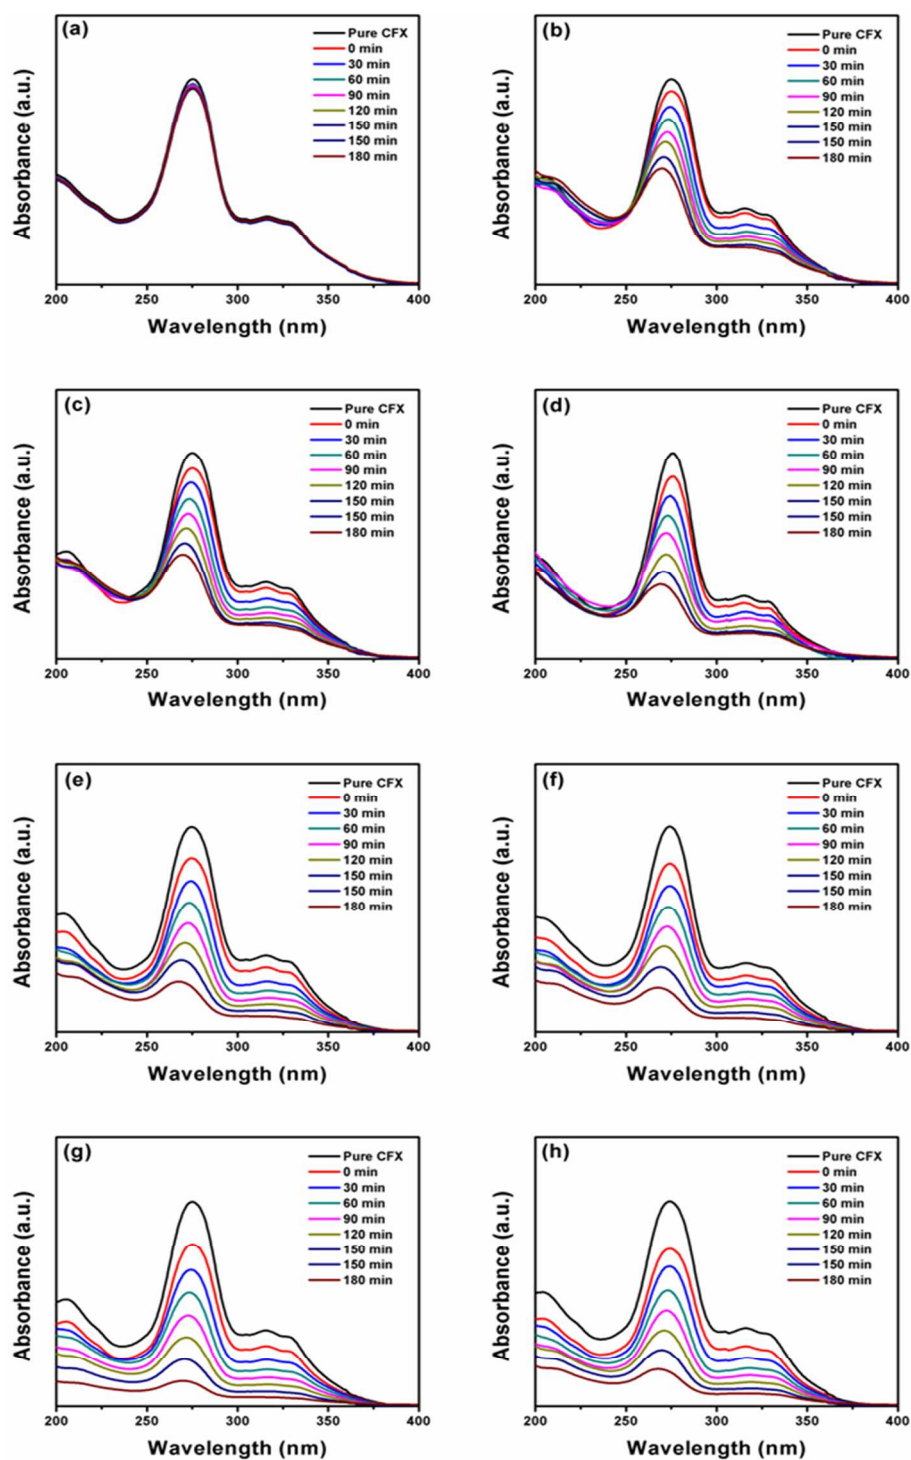

**Figure S13.** Time-dependent UV-vis spectra depicting the photocatalytic degradation of CFX under visible light irradiation: (a) UCNP, (b) UC, (c) UCA, (d) UCAG1, (e) UCAG2, (f) UCAG3, (g) UCAG4, and (h) UCAG5. Experimental conditions: CFX concentration  $5 \times 10^{-5}$  M, photocatalyst 6 mg per 15 mL and irradiation time 3 h.

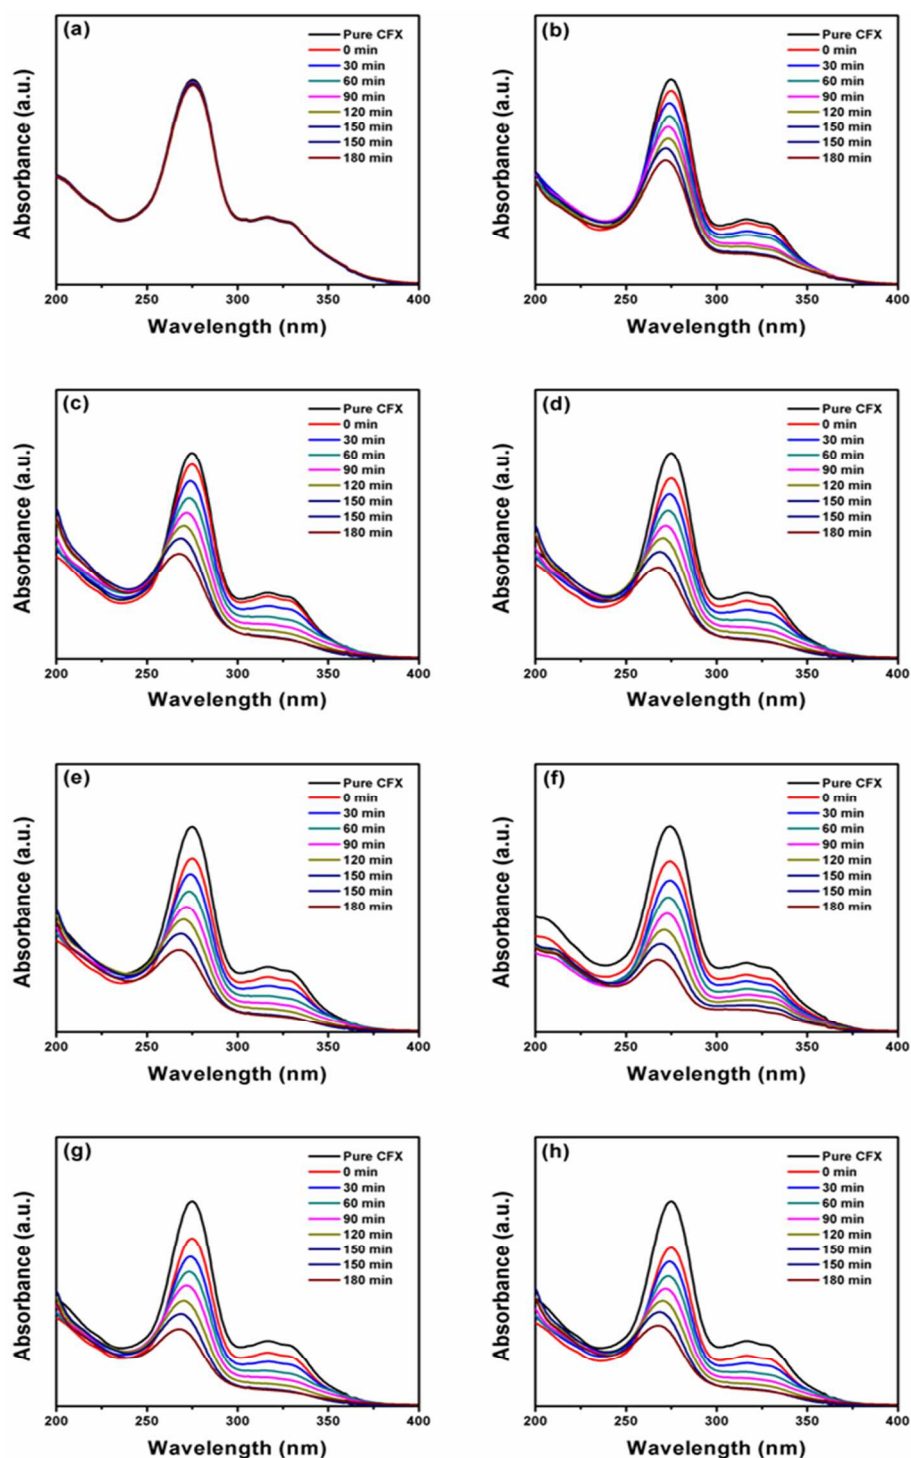

**Figure S14.** Time-dependent UV-vis spectra depicting the photocatalytic degradation of CFX under NIR light irradiation: (a) UCNP, (b) UC, (c) UCA, (d) UCAG1, (e) UCAG2, (f) UCAG3, (g) UCAG4, and (h) UCAG5. Experimental conditions: CFX concentration  $5 \times 10^{-5}$  M, photocatalyst 6 mg per 15 mL and irradiation time 3 h.

**Table S2.** Summary of kinetic data of photocatalytic degradation of CFX using all prepared photocatalysts under visible light irradiation

|                           |                                              | UCNP  | UC    | UCA   | UCAG1 | UCAG2 | UCAG3 | UCAG4 | UCAG5 |
|---------------------------|----------------------------------------------|-------|-------|-------|-------|-------|-------|-------|-------|
| Zero Order                | $R^2$                                        | 0.880 | 0.998 | 0.999 | 0.998 | 0.996 | 0.993 | 0.988 | 0.981 |
|                           | $k \times 10^{-3} \text{ (min}^{-1}\text{)}$ | 0.3   | 3.5   | 3.9   | 4.9   | 5.6   | 5.7   | 6.2   | 5.8   |
| Pseudo First Order        | $R^2$                                        | 0.880 | 0.998 | 0.999 | 0.982 | 0.966 | 0.952 | 0.926 | 0.954 |
|                           | $k \times 10^{-3} \text{ (min}^{-1}\text{)}$ | 2.0   | 3.0   | 3.6   | 5.3   | 6.9   | 7.4   | 9.6   | 8.2   |
| Parabolic diffusion model | $R^2$                                        | 0.941 | 0.967 | 0.995 | 0.992 | 0.987 | 0.980 | 0.985 | 0.993 |
|                           | $k \times 10^{-3} \text{ (min}^{-1}\text{)}$ | 4.7   | 17.6  | 22.3  | 29.8  | 40.8  | 46.8  | 57.0  | 54.8  |
| Modified Freundlich model | $R^2$                                        | 0.976 | 0.987 | 0.997 | 0.995 | 0.989 | 0.983 | 0.986 | 0.992 |
|                           | $k \times 10^{-3} \text{ (min}^{-1}\text{)}$ | 3.0   | 11.9  | 15.9  | 21.7  | 31.5  | 37.6  | 49.0  | 43.4  |

**Table S3.** Summary of kinetic data of photocatalytic degradation of CFX using all prepared photocatalysts under NIR light irradiation

|                     |                                              | UCNP  | UC    | UCA   | UCAG1 | UCAG2 | UCAG3 | UCAG4 | UCAG5 |
|---------------------|----------------------------------------------|-------|-------|-------|-------|-------|-------|-------|-------|
| Zero                | $R^2$                                        | 0.785 | 0.978 | 0.974 | 0.977 | 0.973 | 0.971 | 0.964 | 0.938 |
| Order               | $k \times 10^{-3} \text{ (min}^{-1}\text{)}$ | 0.1   | 3.0   | 4.0   | 4.2   | 4.4   | 4.7   | 4.5   | 4.3   |
| Pseudo              | $R^2$                                        | 0.787 | 0.993 | 0.981 | 0.987 | 0.986 | 0.982 | 0.988 | 0.985 |
| First Order         | $k \times 10^{-3} \text{ (min}^{-1}\text{)}$ | 0.1   | 2.6   | 3.8   | 4.3   | 4.7   | 5.3   | 5.0   | 4.7   |
| Parabolic           | $R^2$                                        | 0.939 | 0.989 | 0.993 | 0.985 | 0.986 | 0.980 | 0.979 | 0.984 |
| diffusion<br>model  | $k \times 10^{-3} \text{ (min}^{-1}\text{)}$ | 2.7   | 15.2  | 23.0  | 31.4  | 37.9  | 44.9  | 42.3  | 38.8  |
| Modified            | $R^2$                                        | 0.979 | 0.995 | 0.997 | 0.989 | 0.988 | 0.981 | 0.976 | 0.978 |
| Freundlich<br>model | $k \times 10^{-3} \text{ (min}^{-1}\text{)}$ | 2.8   | 9.5   | 12.8  | 24.1  | 31.1  | 38.5  | 35.9  | 32.8  |

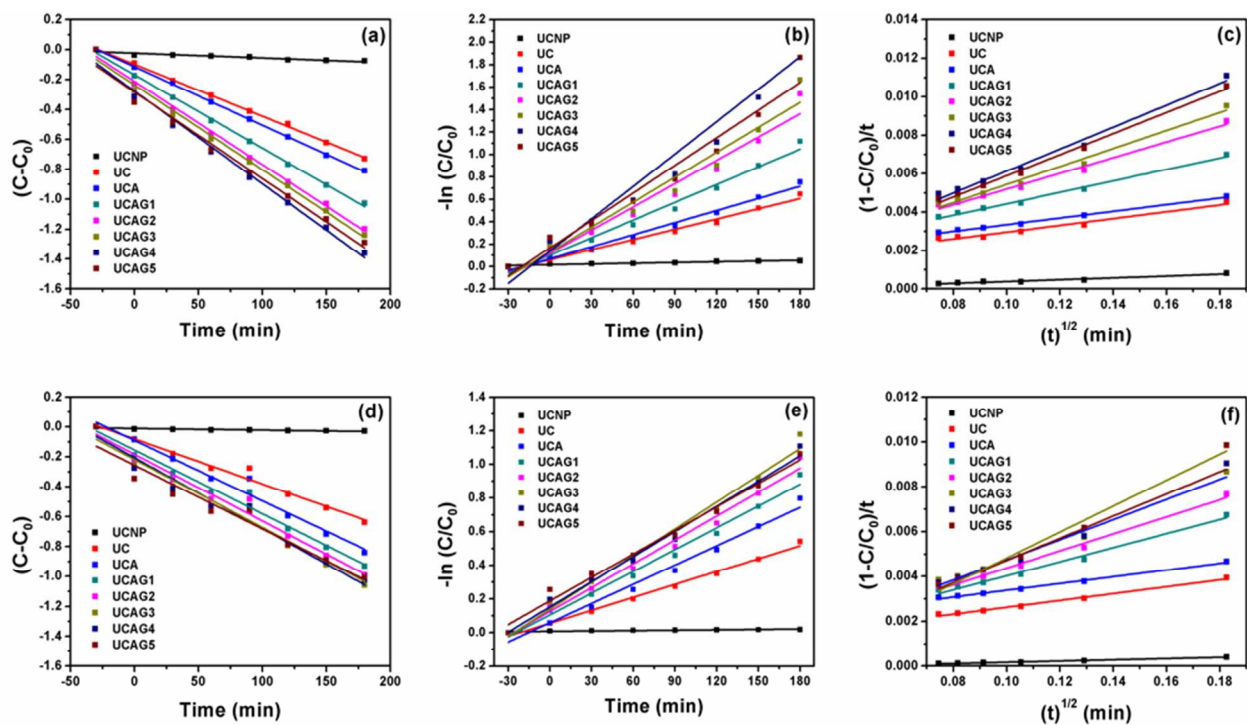

**Figure S15.** Fitting of different models for photocatalytic degradation kinetics under visible light (a) zero-order, (b) first-order, (c) parabolic diffusion model and under NIR light (d) Zero-order, (e) first-order, (f) parabolic diffusion model.

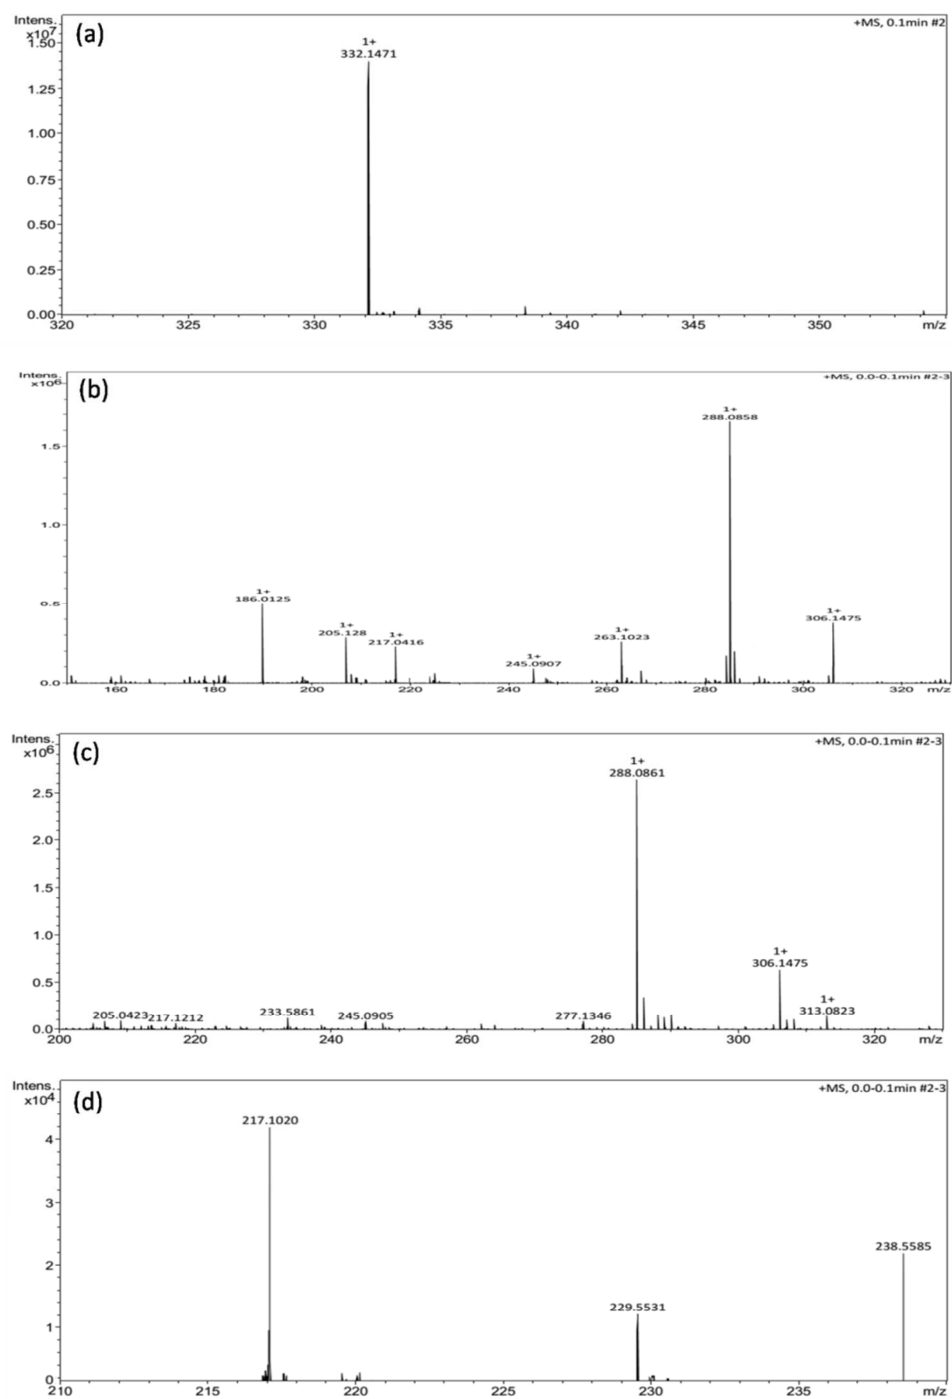

**Figure S16.** Mass spectra of (a) CFX before degradation, and (b, c, d) degradation products of CFX after visible light irradiation for 180 min.

**Table S4.** Summary of observed and calculated molecular ion masses of different fragments obtained by mass analysis and their proposed molecular structures.

| ID of intermediate | Molecular formula     | m/z (observed) | m/z (calculated) | Molecular structure                                                                   |
|--------------------|-----------------------|----------------|------------------|---------------------------------------------------------------------------------------|
| CFX                | $C_{17}H_{18}FN_3O_3$ | 332.14         | 331.27           | 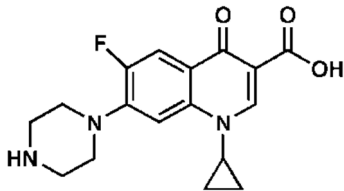   |
| P1                 | $C_{17}H_{19}N_3O_3$  | 313.08         | 313.14           |   |
| P2                 | $C_{16}H_{18}FN_3O$   | 288.08         | 287.33           |  |
| P3                 | $C_{13}H_{11}FN_2O_4$ | 277.13         | 278.07           |  |
| P4                 | $C_{13}H_{12}N_2O_3$  | 245.09         | 244.23           |  |

|    |                       |        |        |                                                                                       |
|----|-----------------------|--------|--------|---------------------------------------------------------------------------------------|
|    |                       |        |        |                                                                                       |
| P5 | $C_{10}H_7FN_2O_4$    | 238.56 | 238.04 | 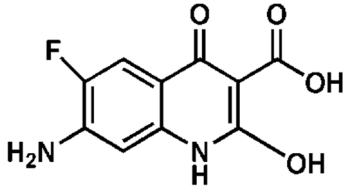   |
| P6 | $C_{13}H_{11}NO_3$    | 229.55 | 229.07 |    |
| P7 | $C_{12}H_{12}FN_2O_2$ | 217.10 | 216.29 |   |
| P8 | $C_{10}H_8N_2O_3$     | 205.13 | 204.25 |  |
| P9 | $C_{12}H_{11}NO$      | 186.01 | 185.22 |  |
